# Supplementary material for: Hepatocellular Carcinoma: Texture Analysis of Preoperative Computed Tomography Images Can Provide Markers of Tumor Grade and Disease-Free Survival
Source: PubMed Central journal article supplement — Korean J Radiol. 2019 Feb 25;20(4):569–79. doi: 10.3348/kjr.2018.0501 (PMC6424831; doi:10.3348/kjr.2018.0501), 2019-02-25
Supplement: kjr-20-569-s004.pdf [file kjr-20-569-s004.pdf]

**Supplementary Table 4. Interobserver Agreement (ICC) for CTTA on Arterial-Phase Images**

| Filter Scale Values | Mean             | SD               | Entropy          | MPP              | Skewness         | Kurtosis         |
|---------------------|------------------|------------------|------------------|------------------|------------------|------------------|
| No filtration       | 0.99 (0.98–1.00) | 0.94 (0.88–0.97) | 0.96 (0.92–0.98) | 0.99 (0.98–0.99) | 0.94 (0.87–0.97) | 0.94 (0.86–0.97) |
| 2.0 (fine)          | 0.99 (0.99–1.00) | 0.83 (0.63–0.92) | 0.99 (0.99–1.00) | 0.94 (0.87–0.97) | 0.78 (0.51–0.90) | 0.99 (0.99–1.00) |
| 3.0 (medium)        | 0.90 (0.78–0.95) | 0.92 (0.81–0.96) | 0.68 (0.29–0.85) | 0.79 (0.54–0.91) | 0.99 (0.99–1.00) | 0.97 (0.93–0.99) |
| 4.0 (medium)        | 0.82 (0.59–0.92) | 0.90 (0.78–0.95) | 0.94 (0.86–0.97) | 0.90 (0.77–0.95) | 0.76 (0.46–0.89) | 0.97 (0.92–0.98) |
| 5.0 (medium)        | 0.94 (0.86–0.97) | 0.93 (0.84–0.97) | 0.99 (0.99–1.00) | 0.86 (0.69–0.94) | 0.99 (0.99–1.00) | 0.88 (0.72–0.95) |
| 6.0 (coarse)        | 0.90 (0.75–0.96) | 0.98 (0.95–0.99) | 0.97 (0.93–0.99) | 0.90 (0.77–0.96) | 0.83 (0.60–0.93) | 0.91 (0.78–0.96) |

Values of ICC (95% CI). Guide to interpretation of ICCs for agreement: values < 0.40 were considered poor; 0.40–0.59, fair; 0.60–0.74, good; and 0.75–1.00, excellent. CTTA = computed tomography texture analysis, ICC = intraclass correlation coefficient
