# Supplementary material for: Hepatocellular Carcinoma: Texture Analysis of Preoperative Computed Tomography Images Can Provide Markers of Tumor Grade and Disease-Free Survival
Source: PubMed Central journal article supplement — Korean J Radiol. 2019 Feb 25;20(4):569–79. doi: 10.3348/kjr.2018.0501 (PMC6424831; doi:10.3348/kjr.2018.0501), 2019-02-25
Supplement: kjr-20-569-s005.pdf [file kjr-20-569-s005.pdf]

**Supplementary Table 5. Interobserver Agreement (ICC) for CTTA on Portal-venous-Phase Images**

| Filter Scale Values | Mean             | SD               | Entropy          | MPP              | Skewness         | Kurtosis         |
|---------------------|------------------|------------------|------------------|------------------|------------------|------------------|
| No filtration       | 0.85 (0.67–0.93) | 0.85 (0.67–0.93) | 0.74 (0.44–0.88) | 0.89 (0.75–0.95) | 0.73 (0.41–0.88) | 0.85 (0.68–0.93) |
| 2.0 (fine)          | 0.94 (0.87–0.97) | 0.97 (0.92–0.98) | 0.84 (0.65–0.93) | 0.84 (0.65–0.93) | 0.78 (0.53–0.90) | 0.78 (0.51–0.90) |
| 3.0 (medium)        | 0.69 (0.32–0.86) | 0.80 (0.56–0.91) | 0.80 (0.56–0.91) | 0.72 (0.39–0.87) | 0.86 (0.69–0.94) | 0.92 (0.83–0.97) |
| 4.0 (medium)        | 0.99 (0.97–0.99) | 0.89 (0.76–0.95) | 0.91 (0.79–0.96) | 0.94 (0.87–0.97) | 0.78 (0.52–0.90) | 0.69 (0.32–0.86) |
| 5.0 (medium)        | 0.99 (0.99–1.00) | 0.99 (0.99–1.00) | 0.96 (0.90–0.98) | 0.99 (0.99–1.00) | 0.82 (0.59–0.92) | 0.94 (0.86–0.97) |
| 6.0 (coarse)        | 0.99 (0.98–1.00) | 0.98 (0.96–1.00) | 0.90 (0.76–0.96) | 0.99 (0.97–1.00) | 0.73 (0.36–0.89) | 0.94 (0.85–0.97) |

Values of ICC (95% CI). Guide to interpretation of ICCs for agreement: values < 0.40 were considered poor; 0.40–0.59, fair; 0.60–0.74, good; and 0.75–1.00, excellent.
